# Supplementary material for: COVID-19 outbreaks in nursing homes: A strong link with the coronavirus spread in the surrounding population, France, March to July 2020
Source: PLOS journal article supplement (doi:10.1371/journal.pone.0261756), 2022-01-07

**S2 Fig.** Observed and modelled cumulative curves of hospitalization for COVID-19 in the *Départements* of Auvergne-Rhône-Alpes Region over the study period (March 1 – July 31, 2020)

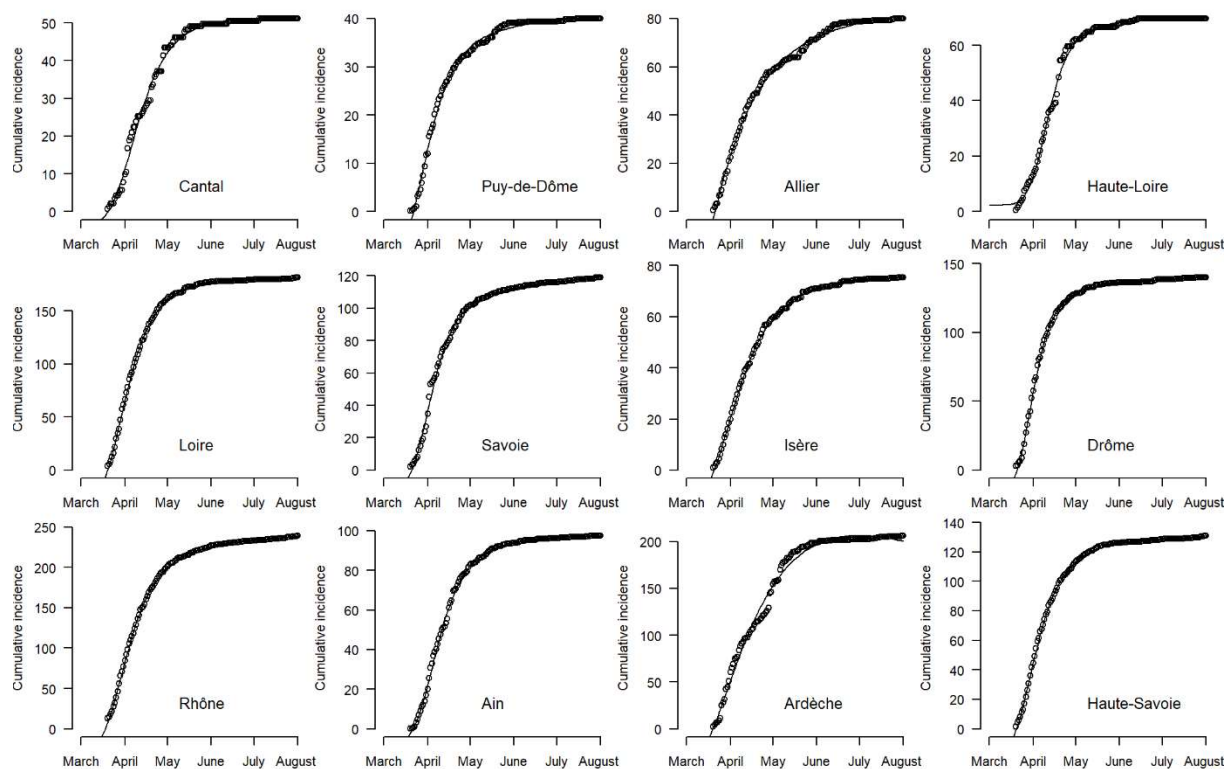

Supplement: S2 (10.1371/journal.pone.0261756.s002) [file journal.pone.0261756.s002]
